# Supplementary material
Source: publisher site journal article supplement (https://www.dovepress.com/article/317970)
Supplement: Supplementary file 1 [file get_supplementary_file.php]

**Supplementary Table 1. Literature search - Eligibility criteria**

| **Criteria** | **Eligibility** |
| --- | --- |
| **Population** | Patients (both adult and paediatric) with sensitive skin |
| **Outcomes** | To include:   - Epidemiology, prevalence of sensitive skin - Symptoms, aetiology, pathogenesis and triggers of sensitive skin - Sensitive skin scale development |
| **Study design** | No restriction, to include:   - Randomised controlled trials - Comparative clinical studies - Observational/non-comparative cohort studies - Meta-analysis/review publication - Registries - Case reports   Both prospective and retrospective studies were eligible for inclusion |
| **Geography** | No restriction |
| **Date of publication** | No restriction |
| **Language of publication** | English language publications or non-English language publications with an English abstract. |

**Supplementary Table 2. Summary of item bank for development**

| **Demographic factors** | **Symptoms and signs** | **Extrinsic Factors** | **Intrinsic Factors** |
| --- | --- | --- | --- |
| - Age - Ethnicity - Gender - Regional sensitivity - Concomitant dermatological conditions - Skin type | - Itch - Stinging/prickling - Burning - Tightness - Erythema/ redness - Dry/flaky - Roughness - Flush/blush - Swelling around eyelids - Hives | - Cold/ windy weather - Hot, dry weather - Sun exposure - Reaction to fabrics (i.e., wool) - Reactivity to cosmetic/laundry products - Food products/alcohol | - Stress/emotion - Pre-existing skin condition/ complaint - Atopy - Family history of atopy |

**Supplementary Table 3. Symptoms and signs of sensitive skin and extrinsic factors**

Cold/ windy weather

| Symptom | Subjects with Sensitive skin | Subjects with non-sensitive skin | p-value (Sensitive vs non-sensitive skin) |
| --- | --- | --- | --- |
| Itch (face) | 835 (54.75 %) | 275 (18.06 %) | <0.0001 |
| Stinging (face) | 731 (47.93 %) | 229 (15.04 %) | <0.0001 |
| Tight (face) | 796 (52.2 %) | 269 (17.66 %) | <0.0001 |
| Burning (face) | 612 (40.13 %) | 184 (12.08 %) | <0.0001 |
| Itch (body) | 741 (48.59 %) | 231 (15.17 %) | <0.0001 |
| Stinging (body) | 538 (35.28 %) | 145 (9.52 %) | <0.0001 |
| Tight (body) | 643 (42.16 %) | 183 (12.02 %) | <0.0001 |
| Burning (body) | 459 (30.1 %) | 111 (7.29 %) | <0.0001 |
| Redness (face) | 788 (51.67 %) | 254 (16.68 %) | <0.0001 |
| Redness (body) | 488 (32 %) | 121 (7.94 %) | <0.0001 |
| Skin dry and flaky | 898 (58.89 %) | 338 (22.19 %) | <0.0001 |
| Scalp irritation | 603 (39.54 %) | 160 (10.51 %) | <0.0001 |
| Skin feels rough | 862 (56.52 %) | 303 (19.89 %) | <0.0001 |
| Flush blush | 739 (48.46 %) | 243 (15.96 %) | <0.0001 |
| Swelling around the eyelids | 417 (27.34 %) | 124 (8.14 %) | <0.0001 |
| Hives | 336 (22.03 %) | 78 (5.12 %) | <0.0001 |

Hot/ dry weather

| Symptom | Subjects with Sensitive skin | Subjects with non-sensitive skin | p-value (Sensitive vs non-sensitive skin) |
| --- | --- | --- | --- |
| Itch (face) | 640 (41.97 %) | 177 (11.62 %) | <0.0001 |
| Stinging (face) | 479 (31.41 %) | 118 (7.75 %) | <0.0001 |
| Tight (face) | 559 (36.66 %) | 163 (10.7 %) | <0.0001 |
| Burning (face) | 547 (35.87 %) | 147 (9.65 %) | <0.0001 |
| Itch (body) | 665 (43.61 %) | 186 (12.21 %) | <0.0001 |
| Stinging (body) | 440 (28.85 %) | 104 (6.83 %) | <0.0001 |
| Tight (body) | 499 (32.72 %) | 139 (9.13 %) | <0.0001 |
| Burning (body) | 485 (31.8 %) | 131 (8.6 %) | <0.0001 |
| Redness (face) | 650 (42.62 %) | 181 (11.88 %) | <0.0001 |
| Redness (Body) | 486 (31.87 %) | 124 (8.14 %) | <0.0001 |
| Skin dry and flaky | 620 (40.66 %) | 180 (11.82 %) | <0.0001 |
| Scalp irritation | 569 (37.31 %) | 152 (9.98 %) | <0.0001 |
| Skin feels rough | 593 (38.89 %) | 155 (10.18 %) | <0.0001 |
| Flush blush | 626 (41.05 %) | 186 (12.21 %) | <0.0001 |
| Swelling around the eyelids | 366 (24 %) | 93 (6.11 %) | <0.0001 |
| Hives | 364 (23.87 %) | 93 (6.11 %) | <0.0001 |

Sun

| Symptom | Subjects with Sensitive skin | Subjects with non-sensitive skin | p-value (Sensitive vs non-sensitive skin) |
| --- | --- | --- | --- |
| Itch (face) | 567 (37.18 %) | 158 (10.37 %) | <0.0001 |
| Stinging (face) | 499 (32.72 %) | 149 (9.78 %) | <0.0001 |
| Tight (face) | 530 (34.75 %) | 162 (10.64 %) | <0.0001 |
| Burning (face) | 574 (37.64 %) | 228 (14.97 %) | <0.0001 |
| Itch (body) | 568 (37.25 %) | 170 (11.16 %) | <0.0001 |
| Stinging (body) | 456 (29.9 %) | 126 (8.27 %) | <0.0001 |
| Tight (body) | 487 (31.93 %) | 152 (9.98 %) | <0.0001 |
| Burning (body) | 522 (34.23 %) | 190 (12.48 %) | <0.0001 |
| Redness (face) | 622 (40.79 %) | 239 (15.69 %) | <0.0001 |
| Redness (body) | 510 (33.44 %) | 194 (12.74 %) | <0.0001 |
| Skin dry and flaky | 536 (35.15 %) | 166 (10.9 %) | <0.0001 |
| Scalp irritation | 522 (34.23 %) | 150 (9.85 %) | <0.0001 |
| Skin feels rough | 512 (33.57 %) | 137 (9 %) | <0.0001 |
| Flush blush | 551 (36.13 %) | 186 (12.21 %) | <0.0001 |
| Swelling around the eyelids | 354 (23.21 %) | 88 (5.78 %) | <0.0001 |
| Hives | 355 (23.28 %) | 89 (5.84 %) | <0.0001 |

Clothes/ fabrics

| Symptom | Subjects with Sensitive skin | Subjects with non-sensitive skin | p-value (Sensitive vs non-sensitive skin) |
| --- | --- | --- | --- |
| Itch (face) | 413 (27.08 %) | 124 (8.14 %) | <0.0001 |
| Stinging (face) | 308 (20.2 %) | 90 (5.91 %) | <0.0001 |
| Tight (face) | 308 (20.2 %) | 78 (5.12 %) | <0.0001 |
| Burning (face) | 309 (20.26 %) | 76 (4.99 %) | <0.0001 |
| Itch (body) | 599 (39.28 %) | 227 (14.9 %) | <0.0001 |
| Stinging (body) | 372 (24.39 %) | 101 (6.63 %) | <0.0001 |
| Tight (body) | 336 (22.03 %) | 78 (5.12 %) | <0.0001 |
| Burning (body) | 347 (22.75 %) | 89 (5.84 %) | <0.0001 |
| Redness (face) | 319 (20.92 %) | 81 (5.32 %) | <0.0001 |
| Redness (body) | 393 (25.77 %) | 102 (6.7 %) | <0.0001 |
| Skin dry and flaky | 349 (22.89 %) | 92 (6.04 %) | <0.0001 |
| Scalp irritation | 333 (21.84 %) | 91 (5.98 %) | <0.0001 |
| Skin feels rough | 369 (24.2 %) | 89 (5.84 %) | <0.0001 |
| Flush blush | 338 (22.16 %) | 88 (5.78 %) | <0.0001 |
| Swelling around the eyelids | 247 (16.2 %) | 68 (4.46 %) | <0.0001 |
| Hives | 271 (17.77 %) | 83 (5.45 %) | <0.0001 |

**Supplementary Table 4. Signs and symptoms of sensitive skin and intrinsic factors**

Pre-existing skin conditions

| Symptom | Subjects with Sensitive skin | Subjects with non-sensitive skin | p-value (Sensitive vs non-sensitive skin) |
| --- | --- | --- | --- |
| Itch | 1055 (69.18 %) | 342 (22.46 %) | <0.0001 |
| Stinging | 709 (46.49 %) | 184 (12.08 %) | <0.0001 |
| Tight | 800 (52.46 %) | 218 (14.31 %) | <0.0001 |
| Burning | 657 (43.08 %) | 175 (11.49 %) | <0.0001 |
| Redness | 882 (57.84 %) | 276 (18.12 %) | <0.0001 |
| Skin dry and flaky | 1001 (65.64 %) | 380 (24.95 %) | <0.0001 |
| Skin feels rough | 902 (59.15 %) | 309 (20.29 %) | <0.0001 |
| Flush blush | 664 (43.54 %) | 185 (12.15 %) | <0.0001 |
| Hives | 436 (28.59 %) | 105 (6.89 %) | <0.0001 |

Stress

| Symptom | Subjects with Sensitive skin | Subjects with non-sensitive skin | p-value (Sensitive vs non-sensitive skin) |
| --- | --- | --- | --- |
| Itch (face) | 690 (45.25 %) | 178 (11.69 %) | <0.0001 |
| Stinging (face) | 470 (30.82 %) | 111 (7.29 %) | <0.0001 |
| Tight (face) | 548 (35.93 %) | 146 (9.59 %) | <0.0001 |
| Burning (face) | 478 (31.34 %) | 111 (7.29 %) | <0.0001 |
| Itch (body) | 661 (43.34 %) | 178 (11.69 %) | <0.0001 |
| Stinging (body) | 412 (27.02 %) | 101 (6.63 %) | <0.0001 |
| Tight (body) | 475 (31.15 %) | 116 (7.62 %) | <0.0001 |
| Burning (body) | 406 (26.62 %) | 87 (5.71 %) | <0.0001 |
| Redness (face) | 642 (42.1 %) | 167 (10.97 %) | <0.0001 |
| Redness (body) | 453 (29.7 %) | 92 (6.04 %) | <0.0001 |
| Skin dry and flaky | 659 (43.21 %) | 179 (11.75 %) | <0.0001 |
| Scalp irritation | 597 (39.15 %) | 170 (11.16 %) | <0.0001 |
| Skin feels rough | 646 (42.36 %) | 160 (10.51 %) | <0.0001 |
| Flush blush | 650 (42.62 %) | 192 (12.61 %) | <0.0001 |
| Swelling around the eyelids | 390 (25.57 %) | 101 (6.63 %) | <0.0001 |
| Hives | 375 (24.59 %) | 94 (6.17 %) | <0.0001 |
